# Supplementary material for: Epigenetic regulation by RARα maintains ligand-independent transcriptional activity
Source: PubMed Central journal article supplement — Nucleic Acids Res. 2011 Sep 10;40(1):102–15. doi: 10.1093/nar/gkr637 (PMC3245912; doi:10.1093/nar/gkr637), 2011-09-10
Supplement: supp_gkr637_nar-01132-x-2011-File007.pdf [file supp_gkr637_nar-01132-x-2011-File007.pdf]

# Appendix

## Primer Sequences

|                               |           |
|-------------------------------|-----------|
| Construction and Sequencing   | Table S1a |
| Gene Expression               | Table S1b |
| Bisulfite Sequencing          | Table S1c |
| Chromatin Immunoprecipitation | Table S1d |

## Differentially expressed transcripts, Wild type versus RAR $\alpha$ <sup>-/-</sup> F9 cells (ligand independent)

|                                                              |           |
|--------------------------------------------------------------|-----------|
| Increased Expression in RAR $\alpha$ <sup>-/-</sup> F9 cells | Table S2a |
| Decreased Expression in RAR $\alpha$ <sup>-/-</sup> F9 cells | Table S2b |

## Differentially expressed genes, ATRA versus vehicle treated Wild type and RAR $\alpha$ <sup>-/-</sup> F9 cells

|                                                                                  |          |
|----------------------------------------------------------------------------------|----------|
| Ligand induced transcripts in Wild type and RAR $\alpha$ <sup>-/-</sup> F9 cells | Table S3 |
|----------------------------------------------------------------------------------|----------|

## Exogeneous RAR $\alpha$ Expression in F9 Wt cells

|                                                                                |
|--------------------------------------------------------------------------------|
| Construction of pSG5 RAR $\alpha$ and pSG5 PML-RAR $\alpha$ Expression Vectors |
| Amino-acid Sequence of the PML-RAR $\alpha$ fusion protein                     |
| Alignment of the PML-RAR $\alpha$ with human PML and human RAR $\alpha$ 1      |

**Table S1a. Construction and Sequencing Primers**

| Forward      | Sense primer (5'-3')                | Reverse      | Antisense primer (5'-3')            | Product |
|--------------|-------------------------------------|--------------|-------------------------------------|---------|
| mPML(+)/MN   | tttcaattgCCatgGAAACTGAAACCGTTTCCGT  | mPML(-)TH    | ttaaagcttGACTGGGTCGTTTCCCCTGTGTCACT | 1696bp  |
| mRARα2A(+)/M | TTTcaattgCCatgTACGAGAGTGTGGAAGTCG   | mRARα2B(-)TX | TTTCTCGAgaCtgggTCTCGATGGagtgg       | 183bp   |
| mRARαC(+)/MT | tttcaattgCCatggagACcCAGtcCAGCAGTTCC | mRARαE(-)XH  | ttaaagcttactcgagCATTTCCCTGGATCA     | 1058bp  |
| mRARαF(+)/X  | tttctcgagAACTCTGAGGGCTT             | mRARαF(-)H   | ttaaagctTCATGGGGATTGGGTGGCT         | 147bp   |
| mRARα(+)/ΔT  | ACCGACTTGGTgTTTGCCCTTCGC            | mRARα(-)ΔT   | GCGAAGGCAAACACCAAGTCGGT             | na      |
| MCS(+)       | AATTCCAATTGAACTCGAGTTAAGCTTA        | MCS(-)       | GATCTAAGCTTAACTCGAGTTCAATTGG        | na      |
| T7(+)        | TAATACGACTCACTATAGGGCGA             | SP6(+)       | ATTTAGGTGACACTATAGAATAC             | na      |

M; MfeI, N; NcoI, T; Tth111I, H; HindIII, X; XhoI. MCS; multiple cloning site. (+); sense primer, (-); antisense primer. Letters not capped indicate non-complementary bases with specific functions in the resulting PCR product (na: not applicable).

**Table S1b. Gene Expression Primers**

| Forward       | Sense primer (5'-3')              | Reverse      | Antisense primer (5'-3')      | Product | (bp)  |
|---------------|-----------------------------------|--------------|-------------------------------|---------|-------|
| Induced       | by RA                             |              |                               | cDNA    | gDNA  |
| mHoxb2(+)/A   | AGCCCCGAGTTCCTCGGATGA             | mHoxb2(-)B   | CTCCAGCTCCAGCAGTTGCGTGTG      | 207     | 8385  |
| mCyp26a1(+)/A | GAAACATTCGAGATGGTGCCTTCAG         | mCyp26a1(-)B | CGGCTGAAGGCTGCATAATCAC        | 272     | 728   |
| mHoxb5(+)/A   | GCGAGCCAGCTAAGCAGCCCCA            | mHoxb5(-)D   | AGGCGGTCCGGGCCCTTTTCCG        | 166     | 870   |
| mHoxa5(+)/C   | CCCTGGATGCGCAAGCTGCACATT          | mHoxa5(-)F   | TTCTCCAGCTCCAGGGTCTGGTAGCGA   | 105     | 1062  |
| Downregulated | in RARα <sup>-/-</sup>            |              |                               |         |       |
| mMest(+)/E    | CAATCCTGCGGCGGGCGCATGGGA          | mMest(-)F    | GGTAGAAGATGCGTAGGCTTTGTAGGT   | 213     | 2547  |
| mTex13(+)/A   | GTGTTCCTGTCACTTCTGTGCGCCCT        | mTex13(-)B   | GCACAGGCTTCTGAACATCCCGA       | 281     | 530   |
| mHmgcs1(+)/A  | GCCCTGGACCGCTGCTATTCT             | mHmgcs1(-)B  | AGTCATTTCAGGAACATCCGAGCTAGA   | 166     | 1460  |
| mGab1(+)/A    | CCAACTCGCCACCTCGACAACA            | mGab1(-)B    | GAGAGTCGCTGCTCGATGTCGTA       | 393     | 10252 |
| mTcfap2a(+)/A | TTACCTCACGCCATCGAGGACGT           | mTcfap2a(-)B | GCTGTTGGACTTGGACAGGGACA       | 108     | 5075  |
| mBcl11a(+)/C  | CCTCTCCTCGGTCTGCACACGGA           | mBcl11a(-)D  | GAAACCATGCATGGTGAATGGCTGT     | 141     | 4932  |
| Upregulated   | in RARα <sup>-/-</sup>            |              |                               |         |       |
| mSlc38a4(+)/A | CCTTCTTGGCGCCCTTTTGGTTAT          | mSlc38a4(-)B | CAGCACGATGGGCACGGTCAGT        | 157     | 2625  |
| mStmn2(+)/C   | TCTTGCTTCTACCCGGAGCCCGCG          | mStmn2(-)D   | CCAGCTTTTCTGAATCTCCTCCAGA     | 153     | 2435  |
| mRpl39l(+)/A  | GCGGTGAGCGCTCACACA                | mRpl39l(-)B  | TCCATTGTGGAATGGGACGAT         | 203     | 4082  |
| mRef2l(+)/C   | TACAAGAGAGCAGTCTGCCGTGA           | mRef2l(-)B   | ATGGGTCCCGTCTTGTGCAGCT        | 913     | 1781  |
| mMobb(+)/A    | GGCCCGCTATCCACAGGAACCT            | mMobb(-)B    | TCTGGCAGGCACAGCAGATCCAGT      | 327     | 18251 |
| mRlf(+)/A     | CAGCAGCTCCAAACGGCCAGTGA           | mRlf(-)B     | CATTTCCATCTTCACTTGATCTGAGTT   | 258     | 8285  |
| Controls      |                                   |              |                               |         |       |
| m36B4(+)/A    | AGAACAACCCAGCTCTGGAGAAA           | m36B4(-)B    | ACACCTCCAGAAAGCGAGAGT         | 448     | 629   |
| mHPRT1(+)/A   | GCTTGTGTTGAAAAGGACCTCTCGAAG       | mHPRT1(-)B   | CCCTGAAGTACTCATTATAGTCAAGGCAT | 117     | 288   |
| Genotyping    |                                   |              |                               |         |       |
| mRARαE6(+)    | TCAGAGAGCTACACGCTGACG             | mRARαE7(-)   | ATGGTGAGGGTGGTGAAGCCG         | 239     | 414   |
| mRARαE34(+)   | TGGCTCAAACCACTCCATCGAGA           | mRARαE6(-)   | CCTGGTGCCTTTGCGAACC           | 425     | 3944  |
| mRARβ2A(+)    | tttcaattgCCatgTTTGACTGTATGGATTTCT | mRARβE4(-)   | CACTGACCCATAGTGGTA            | 289     | 26584 |
| mRARγ2A(+)    | tttcaattgCCatgTACGACTGCATGGAATCGT | mRARγE7(-)   | TTGCTGACCTTGGTGATGAGTT        | 551     | 6031  |
| rβ-globin5'C  | TATTCAGAAAGTAGTGAGGAGGC           | rβ-globin3'B | CGCCCTATAGTGAGTCTGATTACA      | 162     | 735   |

**Table S1c. Bisulfite Sequencing primers**

| Forward          | Sense primer (5'-3')             | Reverse         | Antisense primer (5'-3')      | Product | Position  |
|------------------|----------------------------------|-----------------|-------------------------------|---------|-----------|
| mMestCpG(+)/G    | GTTTTTTAGGGTTTAGGGATTAGTG        | mMestCpG(-)H    | CAACAAAAACAACAACAACATC        | 453     | -337;+116 |
| mMestCpG(+)/G    | GTTTTTTAGGGTTTAGGGATTAGTG        | mMestCpG(-)J    | CCTTAAAAATAAAAATTTTACCTCCC    | 695     | -337;+358 |
| mStmn2CpG(+)/I   | GAGAGTTAATTTGTTTGGAGTTTGTG       | mStmn2CpG(-)J   | ATTCTATCATAAATATCTTTCCCTTTATA | 324     | -103;+224 |
| mStmn2CpG(+)/I   | GAGAGTTAATTTGTTTGGAGTTTGTG       | mStmn2CpG(-)L   | TTCCCTTTAATCTCTTAAAACTC       | 368     | -103;+268 |
| mTex13CpG(+)/E   | TTTTGTTTTTAAATGGGTTTTAAATAAATAGT | mTex13CpG(-)F   | ACAAAAATAACAAAAACAAAAACC      | 277     | -248;+29  |
| mSlc38a4CpG(+)/I | TTTGGAAAGATGTTTTTGTGATAG         | mSlc38a4CpG(-)F | CCTACCCTAATTTACTTCACTTCTAATCA | 497     | -123;+374 |
| mCyp26a1CpG(+)/E | TGAATTAATTTGTTTGGATTAAGGTAA      | mCyp26a1CpG(-)F | ACAATACAAATCCCAAACTTAAAC      | 219     | -67;+152  |

**Table S1d. CHIP primers**

| Forward          | Sense primer (5'-3')      | Reverse         | Antisense primer (5'-3')     | Product | Position  |
|------------------|---------------------------|-----------------|------------------------------|---------|-----------|
| mMest(+)/G       | GTCTTCCAGGGTCTAGGGACCAGTG | mMest(-)N       | TCTCTAATCCTGAACCCAGATTCTAGT  | 140     | -337;-197 |
| mSlc38a4(+)/I    | CCTGGAAGATGTTTCTGTGACAG   | mSlc38a4(-)J    | GTTAGGATCTAGCCCTAAAAATCCAC   | 277     | -123;+171 |
| mStmn2(+)/I      | GAGAGCCAATCTGCTTGAGCTTCTG | mStmn2(-)L      | GGAGAGAGCGAGAGAGGAGTCTGAGT   | 125     | -103;+22  |
| mTex13(+)/I      | TGCCAGTCTGGAAGTTGGAACAGT  | mTex13(-)H      | GCGACAGAAGTGACAGGAACACAAGACC | 164     | -132;+32  |
| mCyp26a1-R1(+)/A | CCCAGTCCGCAATTAAGATGA     | mCyp26a1-R1(-)B | CTTTATAAGGCGCCAGGTTAC        | 87      | -97;-10   |

**Table S2a. Increased Expression in F9 RAR $\alpha$ <sup>-/-</sup> cells (2.7 fold or more relative to Wt)**

| 8h atRA     |         | EtOH        |         | Gene Symbol    | Gene ID   | Gene Title                                                     | Location | Tissue / Process      |
|-------------|---------|-------------|---------|----------------|-----------|----------------------------------------------------------------|----------|-----------------------|
| Fold Change | P-value | Fold Change | P-value |                |           |                                                                |          |                       |
| 11.09       | 0.00087 | 10.35       | 0.00142 | <b>Slc38a4</b> | AK003626  | solute carrier family 38, member 4                             | chr15    | Aminoacid transporter |
| 9.991       | 0.00083 | 10.25       | 0.00090 | <b>Slc38a4</b> | AK003626  | solute carrier family 38, member 4                             | chr15    | and Fetal Liver Dev.  |
| 5.915       | 0.00012 | 6.622       | 0.00044 | RpL39l         | AK005645  | ribosomal protein L39-like                                     | chr16    | Testis expressed      |
| 7.073       | n.s.    | 5.726       | n.s.    | Ref2L/SREFL    | BG071029  | similar to RNA and export factor binding protein 1-II          | chr10    |                       |
| 5.339       | 0.00884 | 5.533       | 0.01190 | <b>Stmn2</b>   | BM115022  | stathmin-like 2                                                | chr3     | Neurogenesis, DRG     |
| 4.395       | 0.00329 | 4.665       | 0.00726 | <b>Stmn2</b>   | BM115022  | stathmin-like 2                                                | chr3     | and Fetal Brain Dev.  |
| 3.236       | 0.01630 | 4.108       | 0.01470 | Mobp           | BM899593  | myelin-associated oligodendrocytic basic protein               | chr9     | Neurogenesis          |
| 2.860       | 0.00238 | 3.192       | 0.00267 | Mobp           | BM899593  | myelin-associated oligodendrocytic basic protein               | chr9     | and Spinal cord       |
| 2.926       | 0.00143 | 3.412       | 0.01740 | Hook1          | AV240656  | hook homolog 1 (Drosophila)                                    | chr4     | Testis expressed      |
| 3.006       | n.s.    | 3.036       | 0.03330 | Chd2           | BE199465  | chromodomain helicase DNA binding protein 2                    | chr7     | Brain, Pituitary      |
| 4.431       | n.s.    | 3.007       | 0.02070 | Rlf            | BB704706  | rearranged L-myc fusion sequence                               | chr4     | Placental factor      |
| 2.246       | n.s.    | 2.990       | 0.04250 | Atrx           | BB825830  | alpha thalassemia/mental retardation syndrome X-linked homolog | chrX     | Mental retardation    |
| 2.737       | 0.00791 | 2.941       | 0.00795 | Gcm1           | NM_008103 | glial cells missing homolog 1 (Drosophila)                     | chr9     | Placental factor      |
| 2.776       | n.s.    | 2.892       | 0.00619 | 2700049A03Rik  | BM230224  | RIKEN cDNA 2700049A03 gene                                     | chr12    | Testis expressed      |
| 3.029       | 0.01100 | 2.838       | 0.00737 | Nhedc1         | AK015318  | Na <sup>+</sup> /H <sup>+</sup> exchanger domain containing 1  | chr3     | Testis expressed      |
| 2.694       | 0.01010 | 2.584       | 0.00352 | Nhedc1         | AK015318  | Na <sup>+</sup> /H <sup>+</sup> exchanger domain containing 1  | chr3     | Testis expressed      |
| 2.834       | 0.00075 | 2.821       | 0.00132 | Sema3e         | Z93948    | sema domain, immunoglobulin domain (lg)                        | chr5     | Placental factor      |
| 2.687       | 0.00736 | 2.369       | 0.00130 | Sema3e         | Z93948    | sema domain, immunoglobulin domain (lg)                        | chr5     | Placental factor      |

**Table S2b. Decreased Expression in F9 RAR $\alpha$ <sup>-/-</sup> cells (0.5 fold or less relative to Wt)**

| 8h atRA     |         | EtOH        |         | Gene Symbol  | Gene ID   | Gene Title                                                  | Location | Tissue / Process       |
|-------------|---------|-------------|---------|--------------|-----------|-------------------------------------------------------------|----------|------------------------|
| Fold Change | P-value | Fold Change | P-value |              |           |                                                             |          |                        |
| 0.122       | 0.01020 | 0.113       | 0.00731 | <b>Mest</b>  | AW555393  | mesoderm specific transcript                                | chr6     | Placental factor       |
| 0.128       | 0.00006 | 0.143       | 0.00000 | Gab1         | NM_021356 | growth factor receptor bound protein 2-associated protein 1 | chr8     | Placental factor, DRG  |
| 0.143       | 0.00004 | 0.144       | 0.00001 | Gab1         | NM_021356 | growth factor receptor bound protein 2-associated protein 1 | chr8     | and Spinal cord        |
| 0.144       | 0.00014 | 0.148       | 0.00001 | Gab1         | NM_021356 | growth factor receptor bound protein 2-associated protein 1 | chr8     |                        |
| 0.281       | 0.00564 | 0.294       | 0.00002 | <b>Tex13</b> | AK016637  | testis expressed gene 13                                    | chrX     | Testis expressed       |
| 0.303       | 0.00002 | 0.325       | 0.00009 | <b>Tex13</b> | AK016637  | testis expressed gene 13                                    | chrX     | And Placental factor   |
| 0.498       | 0.00345 | 0.375       | 0.01130 | Bcl11a       | BF731393  | B-cell CLL/lymphoma 11A (zinc finger protein)               | chr11    | B-cell, fetal brain    |
| 0.411       | 0.01880 | 0.389       | 0.01050 | Tcfap2a      | NM_011547 | transcription factor AP-2, alpha                            | chr13    | Neurogenesis, placenta |
| 0.339       | 0.00225 | 0.395       | 0.00263 | LemD1vF      | Ai842757  | RIKEN cDNA 6430514M23 gene                                  | chr1     | Testis expressed       |
| 0.458       | 0.00966 | 0.404       | 0.00408 | LemD1vF      | Ai849139  | RIKEN cDNA 6430514M23 gene                                  | chr1     |                        |
| 0.408       | 0.00004 | 0.445       | 0.00088 | Cux1         | BC014289  | cut-like homeobox 1                                         | chr5     | Placenta/Testis        |
| 0.440       | 0.03010 | 0.446       | 0.00019 | Hmgcs1       | BB705380  | 3-hydroxy-3-methylglutaryl-Coenzyme A synthase 1            | chr13    | Reductase function     |
| 0.453       | 0.01440 | 0.472       | 0.00036 | Hmgcs1       | BB705380  | 3-hydroxy-3-methylglutaryl-Coenzyme A synthase 1            | chr13    | Bronchial epithelium   |
| 0.455       | 0.00196 | 0.495       | 0.01950 | Hmgcs1       | BB705380  | 3-hydroxy-3-methylglutaryl-Coenzyme A synthase 1            | chr13    | And Fetal liver.       |
| 0.405       | 0.00450 | 0.458       | 0.00170 | Ildr1        | BG084606  | immunoglobulin-like domain containing receptor 1            | chr16    |                        |
| 0.491       | 0.02640 | 0.460       | 0.00118 | Dars2        | BM228846  | aspartyl-tRNA synthetase 2 (mitochondrial)                  | chr1     |                        |
| 0.446       | 0.00050 | 0.461       | 0.00051 | Mmp11        | NM_008606 | matrix metalloproteinase 11                                 | chr10    | Placental factor       |
| 0.459       | 0.00478 | 0.484       | 0.00266 | Spire1       | AU067702  | spire homolog 1 (Drosophila)                                | chr18    | Brain                  |
| 0.343       | 0.00056 | 0.491       | 0.01810 | Hoxb5        | NM_008268 | homeo box B5                                                | chr11    |                        |
| 0.436       | 0.00350 | 0.528       | n.s.    | Ebf1         | BB125261  | early B-cell factor 1                                       | chr11    | B-cell                 |
| 0.473       | 0.02540 | 0.532       | n.s.    | Ebf1         | BB125261  | early B-cell factor 1                                       | chr11    | B-cell                 |
| 0.498       | 0.01380 | 0.558       | n.s.    | Ebf1         | BB125261  | early B-cell factor 1                                       | chr11    | B-cell                 |

**Differentially Expressed Transcripts identified by Microarray Analysis of F9 Wt and RAR $\alpha$ <sup>-/-</sup> cells.** Fold Change denotes the expression in F9 RAR $\alpha$ <sup>-/-</sup> relative to Wt cells upon 8 hr exposure of either RA or vehicle. Gene symbols and titles are in accordance with NCBI nomenclature. Gene symbols in bold indicate that the transcript levels have been validated by real-time PCR. Multiple entrez of a gene indicate differential detection with multiple probes. Expression of the respective genes was mapped to specific tissues based on references presented in the paper and on expression data deposited in BioGPS, The Gene Portal Hub (<http://biogps.gnf.org>). DRG: dorsal root ganglia.

**Table S3. Fold increase in transcript level in F9 Wt and RAR $\alpha$ <sup>-/-</sup> cells upon RA treatment**  
**3.0 fold or more upon 8h RA treatment of Wt or RAR $\alpha$ <sup>-/-</sup> cells (relative to vehicle treated cells)**

| RAR $\alpha$ <sup>-/-</sup> :Wt |         | Wt          |         | RAR $\alpha$ <sup>-/-</sup> |         | Gene Symbol    | Public ID | Gene Title                                             | Location |
|---------------------------------|---------|-------------|---------|-----------------------------|---------|----------------|-----------|--------------------------------------------------------|----------|
| Ratio of Fold Change            | Average | Fold Change | P-value | Fold Change                 | P-value |                |           |                                                        |          |
| 0.71                            | 4.0     | 4.690       | 0.00115 | 3.319                       | 0.05387 | <b>Hoxb5</b>   | NM_008268 | homeo box B5                                           | chr11    |
| 0.79                            | 4.0     | 4.468       | 0.00312 | 3.534                       | 0.00001 | Cdx1           | BC019986  | caudal type homeo box 1                                | chr18    |
| 0.69                            | 3.6     | 4.226       | 0.00054 | 2.936                       | 0.00069 | Csn3           | NM_007786 | casein kappa                                           | chr5     |
| 0.74                            | 3.6     | 4.162       | 0.00011 | 3.094                       | 0.00164 | Tmtc1          | AV341449  | transmembrane and tetratricopeptide containing 1       | chr6     |
| 0.70                            | 3.4     | 4.023       | 0.00049 | 2.819                       | 0.00035 | Aurkc          | NM_020572 | aurora kinase C                                        | chr7     |
| 0.75                            | 3.3     | 3.780       | 0.01960 | 2.825                       | 0.00027 | MP11           | BC005730  | RIKEN cDNA A330049M08 gene                             | chr4     |
| 0.70                            | 2.9     | 3.392       | 0.00165 | 2.385                       | 0.00002 | Rarb           | BB266455  | retinoic acid receptor, beta                           | chr14    |
| 0.78                            | 2.9     | 3.280       | 0.01380 | 2.559                       | 0.00065 | Pdgfrb         | AA499047  | platelet derived growth factor receptor, b polypeptide | chr18    |
| 0.66                            | 2.8     | 3.326       | 0.00432 | 2.184                       | 0.00340 | <b>Hoxb2</b>   | NM_134032 | homeo box B2                                           | chr19    |
| 1.03                            | 3.2     | 3.141       | 0.00785 | 3.226                       | 0.00002 | <b>Cyp26a1</b> | NM_007811 | cytochrome P450, family 26, subfamily a, polypeptide   | chr19    |
| 1.07                            | 2.9     | 2.844       | 0.00760 | 3.045                       | 0.02380 | <b>Hoxa5</b>   | BC011063  | homeo box A5                                           | chr6     |

**RA induced Transcripts identified by Microarray Analysis of F9 Wt and RAR $\alpha$ <sup>-/-</sup> cells.** Fold Change denotes the transcript level in RA treated cells relative to vehicle treated cells. Gene symbols and titles are in accordance with NCBI nomenclature. Gene symbols in bold indicate that the transcript levels have been validated by real-time PCR to be induced by RA to a similar extent in F9 Wt and RAR $\alpha$ <sup>-/-</sup> cells. Ratio of Fold Change indicates the fold induction in RAR $\alpha$ <sup>-/-</sup> cells relative to the fold induction in Wt cells. Average indicates the average fold induction between RAR $\alpha$ <sup>-/-</sup> and Wt cells

#### *Construction of pSG5 RAR $\alpha$ and pSG5 PML-RAR $\alpha$*

A multiple cloning site was introduced into EcoRI opened and alkaline phosphate treated pSG5, mammalian expression vector (Cat. #216201, Stratagene, CA) by insertion of the annealed MCS(+) and MCS(-) oligos through a T4 ligation reaction (Cat. #M0202, New England Biolabs, MA). This introduced unique HindIII and XhoI cloning sites, thus generating pSG5 MCS. Fragments mPMLACT, mRAR $\alpha$ 2AB, mRAR $\alpha$ CE, and mRAR $\alpha$ F were generated by Phusion high fidelity PCR reactions (Cat. #F-530, New England Biolabs, MA) on cDNA from F9 Wt cells using mPML(+)/MN/mPML(-)/TH, mRAR $\alpha$ C(+)/MT/mRAR $\alpha$ E(-)/XH and mRAR $\alpha$ F(+)/X/mRAR $\alpha$ F(-)/H primer pairs, respectively. The RAR $\alpha$ BE fragment and pSG5 MCS were digested with MfeI/HindIII and EcoRI/HindIII, respectively, gel purified, and ligated to generate pSG5 mRAR $\alpha$ CE. An undesired Tth111I restriction site was removed using the mRAR $\alpha$ (+) $\Delta$ T/mRAR $\alpha$ (-) $\Delta$ T primer pair in a Quickchange protocol (Cat. #200518, Stratagene, CA), thus generating pSG5 mRAR $\alpha$ CD $\Delta$ T devoid of Tth111I sites. Notably, the introduced mutation is silent and consequently, no change in amino-acid sequence results from the introduced mutation. The RAR $\alpha$ F fragment and pSG5 mRAR $\alpha$ CE $\Delta$ T were both digested with XhoI/HindIII, gel purified, and ligated to generate pSG5 mRAR $\alpha$ CF. The RAR $\alpha$ 2AB fragment and pSG5 mRAR $\alpha$ CF were both digested with MfeI/Tth111I, gel purified, and ligated to generate pSG5 mRAR $\alpha$ 2AF for expression of full-length RAR $\alpha$ 2. The PMLACT fragment and pSG5 MCS were digested with MfeI/HindIII and EcoRI/HindIII, respectively, gel purified, and ligated to generate pSG5 mPMLACT. The pSG5 mPMLACT and pSG5 mRAR $\alpha$ CF were both digested with Tth111I/XbaI, gel purified and ligated to generate pSG5 mPML-RAR $\alpha$  (see the Appendix for complete aminoacid sequence of the expressed transgene). The sequences of the primers are listed in the appendix. The ligated products were each transformed into competent DH5 $\alpha$  bacteria and plated on ampicillin containing LB agar plates for overnight incubation at 37°C. DNA was isolated from resistant colonies and confirmed by restriction analysis to contain inserts of the expected sizes. In addition, the coding region of each construct was verified by sequencing to contain the desired DNA sequence.

## Amino-acid Sequence of the PML-RAR $\alpha$ fusion protein

PML region (residues 1-500 of PML)

METEPVSVQKVPAPPGPSRCRQDSALTPPTMPPEEPESEDEYHSQSPAEOAIQEEFQFLRCPCSQQAQAKCPKLLPCLHTLCSGCLEAPGLQCFICKAPG  
 APGQADANGEALDNVFFESLQRRRLAVFRQIVDAQAACTRCKGLADFWCFECEQLICSKCFEAHQWYLKHEARPLADLRDNSVSSFLDSTRKSNIFCS  
 NTNHRNPALTDIYCRGCAKPLCCTCALLDRNHSHLHCDIGEEIQQWHEELGTMTQTLEEQGRTFDSAHAQMCSAIGQLDHRADIEKQIRARVRQVV  
 DIVQAQERELLEAVNDRYQRDYQEIAGQLSCLAEVLQRIRTSGALVKRMKLYASDQEVLDMHSFLRKALCSSLRQEEPQNKVQLLTRGFEEFKLCLQ  
 DFISCI TORINA AVASPEAASNQPEAASTHPVTTSTPEDLEQPKVQSVQAQALELSKTQPVAMVKTVPGAHPVPVYAFSMQGPITYREASQTVGSM  
 KRKCSHEDCSRKI IKMESTEENEDRLATSSPEQSWPSTFKATSPPHLDGTSNPSTVPEKKILLPNNNHVTSDTGET-

RAR $\alpha$  region (residues 63-462 of RAR $\alpha$ )

TQSSSSEI VPSPPSPPLPRIYKPCFVCQDKSSGYHYGVSACEGCKGFFRRSIQKNMVTCHRDKNCI INKVTNRNCQYCRLOKCFDVGMSKESVR  
 NDRNKKKKEAPKPECSSESYTLTPEVGELIEKVRKAHQETFPALCQLGKYTTNNSSEQRVSLDIDLWDFSELSTKCI IKTVFAKQLPGFTTLTIAD  
 QITLLKAAACLDILILIRICTRYTPEQDTMTFSDGLTLNRTQMHNAGFGLTDLVFAFANQLLPLEMDDAETGLLSAICLICGRDQDLEQPKVDMQLQE  
 PLLEALKVYVVRKRRPSRPHMFKMLMKITDLRSISAKGAERVITLMEIPGSMPLIQEMLENSEGLDLSGQSGGGTRDGGGLAPPGSCSPSLSP  
 SSHRSSPATQSP\*

## Alignment of PML-RAR $\alpha$ with human PML and human RAR $\alpha$ 1

|                    |       |                                                                                                         |  |     |
|--------------------|-------|---------------------------------------------------------------------------------------------------------|--|-----|
|                    |       | 1                                                                                                       |  | 100 |
| PML-RAR $\alpha$ B | (1)   | METEPVSVQKVPAPPGPSRCRQDSALTPPTMPPEEPESEDEYHSQSPAEOAIQEEFQFLRCPCSQQAQAKCPKLLPCLHTLCSGCLEAPGLQCFICKAPG    |  |     |
| hPml               | (1)   | METEPVSVQKVPAPPGPSRCRQDSALTPPTMPPEEPESEDEYHSQSPAEOAIQEEFQFLRCPCSQQAQAKCPKLLPCLHTLCSGCLEAPGLQCFICKAPG    |  |     |
| hRAR $\alpha$ 1    | (1)   | -----                                                                                                   |  |     |
|                    |       | 101                                                                                                     |  | 200 |
| PML-RAR $\alpha$ B | (101) | QADANGEALDNVFFESLQRRRLAVFRQIVDAQAACTRCKGLADFWCFECEQLICSKCFEAHQWYLKHEARPLADLRDNSVSSFLDSTRKSNIFCSNTNHRN   |  |     |
| hPml               | (101) | QADANGEALDNVFFESLQRRRLAVFRQIVDAQAACTRCKGLADFWCFECEQLICSKCFEAHQWYLKHEARPLADLRDNSVSSFLDSTRKSNIFCSNTNHRN   |  |     |
| hRAR $\alpha$ 1    | (1)   | -----                                                                                                   |  |     |
|                    |       | 201                                                                                                     |  | 300 |
| PML-RAR $\alpha$ B | (201) | PALTDIYCRGCAKPLCCTCALLDRNHSHLHCDIGEEIQQWHEELGTMTQTLEEQGRTFDSAHAQMCSAIGQLDHRADIEKQIRARVRQVVVQAQERE       |  |     |
| hPml               | (201) | PALTDIYCRGCAKPLCCTCALLDRNHSHLHCDIGEEIQQWHEELGTMTQTLEEQGRTFDSAHAQMCSAIGQLDHRADIEKQIRARVRQVVVQAQERE       |  |     |
| hRAR $\alpha$ 1    | (1)   | -----                                                                                                   |  |     |
|                    |       | 301                                                                                                     |  | 400 |
| PML-RAR $\alpha$ B | (301) | LLEAVNDRYQRDYQEIAGQLSCLAEVLQRIRTSGALVKRMKLYASDQEVLDMHSFLRKALCSSLRQEEPQNKVQLLTRGFEEFKLCLQDFISCI TORINA   |  |     |
| hPml               | (301) | LLEAVNDRYQRDYQEIAGQLSCLAEVLQRIRTSGALVKRMKLYASDQEVLDMHSFLRKALCSSLRQEEPQNKVQLLTRGFEEFKLCLQDFISCI TORINA   |  |     |
| hRAR $\alpha$ 1    | (1)   | -----                                                                                                   |  |     |
|                    |       | 401                                                                                                     |  | 500 |
| PML-RAR $\alpha$ B | (401) | AVASPEAASNQPEAASTHPVTTSTPEDLEQPKVQSVQAQALELSKTQPVAMVKTVPGAHPVPVYAFSMQGPITYREASQTVGSMKRKCSHEDCSRKI IK    |  |     |
| hPml               | (401) | AVASPEAASNQPEAASTHPVTTSTPEDLEQ-----EASQTVGSMKRKCSHEDCSRKI IK                                            |  |     |
| hRAR $\alpha$ 1    | (1)   | -----                                                                                                   |  |     |
|                    |       | 501                                                                                                     |  | 600 |
| PML-RAR $\alpha$ B | (501) | MESTEENEDRLATSSPEQSWPSTFKATSPPHLDGTSNPSTVPEKKILLPNNNHVTSDTGETTQSSSSEI VPSPPSPPLPRIYKPCFVCQDKSSGYHY      |  |     |
| hPml               | (455) | MESTEENEDRLATSSPEQSWPSTFKATSPPHLDGTSNPSTVPEKKILLPNNNHVTSDTGETEERVVVSSSESDTENLSSHELDDSSSESSLQLEGP        |  |     |
| hRAR $\alpha$ 1    | (1)   | MASNSSCPTGGHNLNGVPPYAFFPPMLGGLSPPGALTTLQHQLPVSGYSTPSPATLETQSSSSEI VPSPPSPPLPRIYKPCFVCQDKSSGYHY          |  |     |
|                    |       | 601                                                                                                     |  | 650 |
| PML-RAR $\alpha$ B | (601) | GVSACEGCKGFFRRSIQKNMVTCHRDKNCI INKVTNRNCQYCRLOKCFEVDGMSKESVRNDRNKKKKEAPKPECSSESYTLTPEVGELIEKVRKAHQETFP  |  |     |
| hPml               | (555) | NSLKALDES LAEPHLEDRTL VFDLKDIDNETQKISQLAAVNRESKFRVLIQPEAFSVYSKAVSLEAGLRHFLSFLTMHRPILACSRLWGPGLPIFFQTL   |  |     |
| hRAR $\alpha$ 1    | (101) | GVSACEGCKGFFRRSIQKNMVTCHRDKNCI INKVTNRNCQYCRLOKCFEVDGMSKESVRNDRNKKKKEVPEKPECSSESYTLTPEVGELIEKVRKAHQETFP |  |     |
|                    |       | 701                                                                                                     |  | 800 |
| PML-RAR $\alpha$ B | (701) | ALCQLGKYTTNNSSEQRVSLDIDLWDFSELSTKCI IKTVFAKQLPGFTTLTIADQITLLKAAACLDILILIRICTRYTPEQDTMTFSDGLTLNRTQMHN    |  |     |
| hPml               | (655) | SDINKLWEPQDTISGFLAVLPLIRERIPGASSFKLGNLAKTYLARNSERSALASVLMARDLCCLEISPLPLAQHIYFSSSLQCFASLQPLIQASVLP       |  |     |
| hRAR $\alpha$ 1    | (201) | ALCQLGKYTTNNSSEQRVSLDIDLWDFSELSTKCI IKTVFAKQLPGFTTLTIADQITLLKAAACLDILILIRICTRYTPEQDTMTFSDGLTLNRTQMHN    |  |     |
|                    |       | 801                                                                                                     |  | 900 |
| PML-RAR $\alpha$ B | (801) | GFGPLTDLVFAFANQLLPLEMDDAETGLLSAICLICGRDQDLEQPKVDMQLQEPLLEALKVYVVRKRRPSRPHMFKMLMKITDLRSISAKGAERVITLKM    |  |     |
| hPml               | (755) | QSEARLLALHNVSFVELLNAYRTNRQEGLEKRYVHLSLQTTPLSSASTQVAQFLQALS THMEGLLEGHAPAGAEGKAESKGLA-----               |  |     |
| hRAR $\alpha$ 1    | (301) | GFGPLTDLVFAFANQLLPLEMDDAETGLLSAICLICGRDQDLEQPKVDMQLQEPLLEALKVYVVRKRRPSRPHMFKMLMKITDLRSISAKGAERVITLKM    |  |     |
|                    |       | 901                                                                                                     |  | 962 |
| PML-RAR $\alpha$ B | (901) | EIPGSMPLIQEMLENSEGLDLSGQSGGGTRDGGGLAPPGSCSPSLSPSSHRSSPATQSP*                                            |  |     |
| hPml               | (840) | -----                                                                                                   |  |     |
| hRAR $\alpha$ 1    | (401) | EIPGSMPLIQEMLENSEGLDLSGQSGGGTRDGGGLAPPGSCSPSLSPSSHRSSPATHSP*                                            |  |     |

Alignment of the predicted amino acid sequence of the generated PML-RAR $\alpha$  fusion with polypeptide sequences of the human PML (Acc# AAI39796.1) and human RAR $\alpha$ 1 (Acc# NP\_000955.1). Note that the gap in the alignment between residues 431 and 476 of the fusion protein is caused by murine specific skipping of PML exon 5.
